# Supplementary material for: Self-Perceived Health Among Migrants Seen in M&eacute;decins du Monde Free Clinics in Europe: Impact of Length of Stay and Wealth of Country of Origin on Migrants&rsquo; Health
Source: Preprints.org preprint supplement (doi:10.20944/preprints201906.0090.v1), 2019-06-11
Supplement: Supplementary file 1 [file supplementary]

# T4 Men Mental Health

Sensitivity analysis for mental SPH, for men; SA1 shows results for Length of Stay (LOS) below and above 3 months; SA2 show results for LOS below 3 months, below 10 years and above 3 months, above 10 years; SA3 shows results for LOS below 3 months, below 5 years and above 3 months, above 5 years; Finally, SA4 shows results for LOS below 3 months, below 5 years and above 3 months, above 5 years and below 10 years, above 10 years.

| Mental Health        |                              |                              |                              |                              |
|----------------------|------------------------------|------------------------------|------------------------------|------------------------------|
| Men                  |                              |                              |                              |                              |
|                      | SA 1                         | SA 2                         | SA 3                         | SA 4                         |
| Age group            |                              |                              |                              |                              |
| 1st quartile [18;28[ | Ref<br>0.91 [0.52;<br>1.58]  | Ref<br>0.90 [0.52;<br>1.58]  | Ref<br>0.96 [0.55;<br>1.69]  | Ref<br>0.96 [0.55;<br>1.69]  |
| 2nd quartile [28;34[ | 0.98 [0.57;<br>1.70]         | 0.97 [0.55;<br>1.69]         | 1.08 [0.61;<br>1.92]         | 1.06 [0.60;<br>1.89]         |
| 3rd quartile [34;44[ | 0.80 [0.44;<br>1.45]         | 0.79 [0.43;<br>1.45]         | 0.89 [0.48;<br>1.64]         | 0.86 [0.47;<br>1.60]         |
| 4th quartile [44;85] |                              |                              |                              |                              |
| Surveyed Countries   |                              |                              |                              |                              |
| Germany              | Ref<br>3.41 [0.77;<br>17.04] | Ref<br>3.47 [0.77;<br>17.53] | Ref<br>3.10 [0.69;<br>15.55] | Ref<br>3.26 [0.72;<br>16.47] |
| Switzerland          | 3.15 [0.97;<br>12.52]        | 3.17 [0.98;<br>12.64]        | 3.25 [1.00;<br>12.91]        | 3.39 [1.04;<br>13.58]*       |
| Spain                | 0.12 [0.03;<br>0.63]*        | 0.13 [0.03;<br>0.65]*        | 0.11 [0.02;<br>0.55]*        | 0.11 [0.02;<br>0.58]*        |
| Turkey               | 1.00 [0.24;<br>4.76]         | 1.01 [0.24;<br>4.83]         | 0.97 [0.23;<br>4.65]         | 1.01 [0.24;<br>4.86]         |
| United Kingdom       |                              |                              |                              |                              |
| Region of Origin     |                              |                              |                              |                              |
| Middle East          | Ref<br>0.84 [0.35;<br>2.10]  | Ref<br>0.84 [0.35;<br>2.09]  | Ref<br>0.82 [0.35;<br>2.06]  | Ref<br>0.81 [0.34;<br>2.03]  |
| Africa               | 0.44 [0.13;<br>1.51]         | 0.45 [0.13;<br>1.53]         | 0.42 [0.12;<br>1.45]         | 0.43 [0.13;<br>1.47]         |
| America              | 1.59 [0.70;<br>3.86]         | 1.60 [0.70;<br>3.88]         | 1.51 [0.66;<br>3.68]         | 1.51 [0.65;<br>3.69]         |
| Asia                 | 0.72 [0.19;<br>2.62]         | 0.73 [0.19;<br>2.64]         | 0.68 [0.18;<br>2.48]         | 0.68 [0.18;<br>2.49]         |
| Europe               | 0.88 [0.30;<br>2.64]         | 0.87 [0.29;<br>2.64]         | 0.89 [0.30;<br>2.69]         | 0.88 [0.30;<br>2.66]         |
| Maghreb              |                              |                              |                              |                              |
| Housing conditions   |                              |                              |                              |                              |
| Instable             | Ref                          | Ref                          | Ref                          | Ref                          |

| Mental Health                                             |                       |                       |                       |                       |
|-----------------------------------------------------------|-----------------------|-----------------------|-----------------------|-----------------------|
| Men                                                       |                       |                       |                       |                       |
|                                                           | SA 1                  | SA 2                  | SA 3                  | SA 4                  |
| Stable                                                    | 1.61 [1.06;<br>2.44]* | 1.61 [1.06;<br>2.45]* | 1.57 [1.04;<br>2.39]* | 1.58 [1.04;<br>2.41]* |
| Income satisfaction                                       |                       |                       |                       |                       |
| Not Enough                                                | Ref                   | Ref                   | Ref                   | Ref                   |
| Enough                                                    | 0.44 [0.20;<br>0.92]* | 0.44 [0.20;<br>0.92]* | 0.47 [0.21;<br>0.99]* | 0.47 [0.21;<br>0.98]* |
| Job                                                       |                       |                       |                       |                       |
| No                                                        | Ref                   | Ref                   | Ref                   | Ref                   |
| Yes                                                       | 2.11 [1.32;<br>3.40]* | 2.11 [1.32;<br>3.40]* | 2.16 [1.35;<br>3.49]* | 2.15 [1.34;<br>3.48]* |
| Insurance coverage                                        |                       |                       |                       |                       |
| Yes                                                       | Ref                   | Ref                   | Ref                   | Ref                   |
| No                                                        | 1.62 [0.74;<br>3.81]  | 1.61 [0.74;<br>3.80]  | 1.67 [0.76;<br>3.96]  | 1.67 [0.76;<br>3.97]  |
| Immigration Status                                        |                       |                       |                       |                       |
| Residence permit                                          | Ref                   | Ref                   | Ref                   | Ref                   |
| Undocumented                                              | 0.44 [0.24;<br>0.79]* | 0.44 [0.24;<br>0.80]* | 0.41 [0.22;<br>0.75]* | 0.41 [0.23;<br>0.76]* |
| Asylum Seeker                                             | 0.34 [0.18;<br>0.63]* | 0.34 [0.18;<br>0.63]* | 0.32 [0.17;<br>0.60]* | 0.32 [0.17;<br>0.61]* |
| Length of Stay                                            |                       |                       |                       |                       |
| Sensitivity Analysis 1                                    |                       |                       |                       |                       |
| Length of Stay below 3 months                             | Ref                   |                       |                       |                       |
| Length of Stay above 3 months                             | 0.80 [0.45;<br>1.45]  |                       |                       |                       |
| Sensitivity Analysis 2                                    |                       |                       |                       |                       |
| Length of Stay below 3 months                             |                       | Ref                   |                       |                       |
| Length of Stay between 3months<br>and 10 years            |                       | 0.79 [0.44;<br>1.44]  |                       |                       |
| Length of Stay above 10 years                             |                       | 0.85 [0.38;<br>1.93]  |                       |                       |
| Sensitivity Analysis 3                                    |                       |                       |                       |                       |
| Length of Stay below 3 months                             |                       |                       | Ref                   |                       |
| Length of Stay between 3 months<br>and 5 years            |                       |                       | 0.88 [0.49;<br>1.63]  |                       |
| Length of Stay above 5 years                              |                       |                       | 0.63 [0.32;<br>1.26]  |                       |
| Sensitivity Analysis 4                                    |                       |                       |                       |                       |
| Length of Stay below 3 months                             |                       |                       |                       | 1.80 [0.86;<br>3.76]  |
| Length of Stay above three months<br>and Below five years |                       |                       |                       | 1.58 [0.90;<br>2.81]  |
| Length of Stay above 5 years and                          |                       |                       |                       | Ref                   |

| Mental Health                 |         |         |         |                      |
|-------------------------------|---------|---------|---------|----------------------|
| Men                           |         |         |         |                      |
|                               | SA 1    | SA 2    | SA 3    | SA 4                 |
| less than 10 years            |         |         |         |                      |
| Length of Stay Above 10 years |         |         |         | 1.40 [0.68;<br>2.90] |
| AIC                           | 692.16  | 694.11  | 692.41  | 693.57               |
| BIC                           | 785.14  | 791.74  | 790.04  | 795.85               |
| Log Likelihood                | -326.08 | -326.05 | -325.21 | -324.79              |
| Deviance                      | 652.16  | 652.11  | 650.41  | 649.57               |
| Num. obs.                     | 772     | 772     | 772     | 772                  |
