# Supplementary material for: Self-Perceived Health Among Migrants Seen in M&eacute;decins du Monde Free Clinics in Europe: Impact of Length of Stay and Wealth of Country of Origin on Migrants&rsquo; Health
Source: Preprints.org preprint supplement (doi:10.20944/preprints201906.0090.v1), 2019-06-11
Supplement: Supplementary file 2 [file supplementary]

# T3 Women Mental Health

Sensitivity analysis for mental SPH, for women; SA1 shows results for Length of Stay (LOS) below and above 3 months; SA2 show results for LOS below 3 months, below 10 years and above 3 months, above 10 years; SA3 shows results for LOS below 3 months, below 5 years and above 3 months, above 5 years; Finally, SA4 shows results for LOS below 3 months, below 5 years and above 3 months, above 5 years and below 10 years, above 10 years.

| Mental Health        |                              |                              |                              |                              |
|----------------------|------------------------------|------------------------------|------------------------------|------------------------------|
| Women                |                              |                              |                              |                              |
|                      | SA 1                         | SA 2                         | SA 3                         | SA 4                         |
| Age group            |                              |                              |                              |                              |
| 1st quartile [18;28[ | Ref<br>0.52 [0.27;<br>1.00]  | Ref<br>0.51 [0.26;<br>0.99]* | Ref<br>0.52 [0.26;<br>1.00]  | Ref<br>0.52 [0.26;<br>1.01]  |
| 2nd quartile [28;34[ | 0.63 [0.34;<br>1.15]         | 0.64 [0.35;<br>1.16]         | 0.63 [0.34;<br>1.15]         | 0.63 [0.34;<br>1.15]         |
| 3rd quartile [34;44[ | 0.59 [0.32;<br>1.09]         | 0.62 [0.33;<br>1.15]         | 0.59 [0.31;<br>1.10]         | 0.60 [0.32;<br>1.13]         |
| 4th quartile [44;85] |                              |                              |                              |                              |
| Surveyed Countries   |                              |                              |                              |                              |
| Germany              | Ref<br>4.85 [0.68;<br>45.03] | Ref<br>4.88 [0.68;<br>45.35] | Ref<br>4.84 [0.67;<br>44.95] | Ref<br>4.87 [0.68;<br>45.29] |
| Switzerland          | 0.74 [0.21;<br>2.61]         | 0.73 [0.21;<br>2.57]         | 0.74 [0.21;<br>2.62]         | 0.72 [0.20;<br>2.56]         |
| Spain                | 0.08 [0.02;<br>0.38]*        | 0.08 [0.02;<br>0.38]*        | 0.08 [0.02;<br>0.38]*        | 0.08 [0.02;<br>0.37]*        |
| Turkey               | 0.31 [0.08;<br>1.19]         | 0.31 [0.08;<br>1.21]         | 0.30 [0.08;<br>1.20]         | 0.30 [0.07;<br>1.19]         |
| United Kingdom       |                              |                              |                              |                              |
| Region of Origin     |                              |                              |                              |                              |
| Middle East          | Ref<br>2.22 [0.59;<br>11.38] | Ref<br>2.24 [0.60;<br>11.51] | Ref<br>2.20 [0.59;<br>11.35] | Ref<br>2.20 [0.59;<br>11.31] |
| Africa               | 2.49 [0.55;<br>14.41]        | 2.51 [0.55;<br>14.57]        | 2.48 [0.55;<br>14.38]        | 2.55 [0.56;<br>14.78]        |
| America              | 3.57 [0.90;<br>19.05]        | 3.55 [0.90;<br>18.92]        | 3.55 [0.89;<br>18.99]        | 3.49 [0.88;<br>18.67]        |
| Asia                 | 2.32 [0.51;<br>13.27]        | 2.37 [0.52;<br>13.52]        | 2.31 [0.50;<br>13.24]        | 2.34 [0.51;<br>13.36]        |
| Europe               | 3.39 [0.67;<br>21.43]        | 3.59 [0.70;<br>22.73]        | 3.38 [0.66;<br>21.36]        | 3.50 [0.68;<br>22.20]        |
| Maghreb              |                              |                              |                              |                              |
| Housing conditions   |                              |                              |                              |                              |
| Instable             | Ref<br>1.96 [1.26;<br>3.08]* | Ref<br>1.96 [1.26;<br>3.09]* | Ref<br>1.96 [1.26;<br>3.08]* | Ref<br>1.95 [1.25;<br>3.07]* |
| Stable               |                              |                              |                              |                              |

| Mental Health                                             |                             |                             |                             |                             |
|-----------------------------------------------------------|-----------------------------|-----------------------------|-----------------------------|-----------------------------|
| Women                                                     |                             |                             |                             |                             |
|                                                           | SA 1                        | SA 2                        | SA 3                        | SA 4                        |
| Income satisfaction                                       |                             |                             |                             |                             |
| Not Enough                                                | Ref<br>1.22 [0.69;<br>2.17] | Ref<br>1.21 [0.68;<br>2.15] | Ref<br>1.22 [0.69;<br>2.17] | Ref<br>1.20 [0.67;<br>2.14] |
| Enough                                                    |                             |                             |                             |                             |
| Job                                                       |                             |                             |                             |                             |
| No                                                        | Ref<br>1.47 [0.90;<br>2.40] | Ref<br>1.49 [0.91;<br>2.43] | Ref<br>1.46 [0.89;<br>2.41] | Ref<br>1.46 [0.89;<br>2.40] |
| Yes                                                       |                             |                             |                             |                             |
| Insurance coverage                                        |                             |                             |                             |                             |
| Yes                                                       | Ref<br>1.79 [0.80;<br>4.46] | Ref<br>1.79 [0.80;<br>4.47] | Ref<br>1.80 [0.79;<br>4.52] | Ref<br>1.84 [0.81;<br>4.63] |
| No                                                        |                             |                             |                             |                             |
| Immigration Status                                        |                             |                             |                             |                             |
| Residence permit                                          | Ref<br>0.91 [0.50;<br>1.68] | Ref<br>0.90 [0.49;<br>1.67] | Ref<br>0.92 [0.50;<br>1.71] | Ref<br>0.91 [0.49;<br>1.69] |
| Undocumented                                              | 0.73 [0.39;<br>1.40]        | 0.72 [0.38;<br>1.38]        | 0.73 [0.39;<br>1.41]        | 0.71 [0.37;<br>1.37]        |
| Asylum Seeker                                             |                             |                             |                             |                             |
| Length of Stay                                            |                             |                             |                             |                             |
| Sensitivity Analysis 1                                    |                             |                             |                             |                             |
| Length of Stay below 3 months                             | Ref                         |                             |                             |                             |
| Length of Stay above 3 months                             | 0.70 [0.38;<br>1.33]        |                             |                             |                             |
| Sensitivity Analysis 2                                    |                             |                             |                             |                             |
| Length of Stay below 3 months                             |                             | Ref                         |                             |                             |
| Length of Stay between 3months<br>and 10 years            |                             | 0.74 [0.40;<br>1.40]        |                             |                             |
| Length of Stay above 10 years                             |                             | 0.56 [0.22;<br>1.37]        |                             |                             |
| Sensitivity Analysis 3                                    |                             |                             |                             |                             |
| Length of Stay below 3 months                             |                             |                             | Ref                         |                             |
| Length of Stay between 3 months<br>and 5 years            |                             |                             | 0.70 [0.37;<br>1.34]        |                             |
| Length of Stay above 5 years                              |                             |                             | 0.72 [0.35;<br>1.49]        |                             |
| Sensitivity Analysis 4                                    |                             |                             |                             |                             |
| Length of Stay below 3 months                             |                             |                             |                             | 1.26 [0.59;<br>2.68]        |
| Length of Stay above three months<br>and Below five years |                             |                             |                             | 0.89 [0.52;<br>1.53]        |
| Length of Stay above 5 years and<br>less than 10 years    |                             |                             |                             | Ref                         |
| Length of Stay Above 10 years                             |                             |                             |                             | 0.71 [0.31;<br>1.33]        |

| Mental Health  |         |         |         |         |
|----------------|---------|---------|---------|---------|
| Women          |         |         |         |         |
|                | SA 1    | SA 2    | SA 3    | SA 4    |
|                |         |         |         | 1.53]   |
| AIC            | 609.68  | 611.75  | 611.67  | 612.90  |
| BIC            | 696.87  | 703.34  | 703.22  | 708.81  |
| Log Likelihood | -284.84 | -284.87 | -284.83 | -284.45 |
| Deviance       | 569.68  | 569.75  | 569.67  | 568.90  |
| Num. obs.      | 578     | 579     | 578     | 578     |
