# Supplementary material for: Self-Perceived Health Among Migrants Seen in M&eacute;decins du Monde Free Clinics in Europe: Impact of Length of Stay and Wealth of Country of Origin on Migrants&rsquo; Health
Source: Preprints.org preprint supplement (doi:10.20944/preprints201906.0090.v1), 2019-06-11
Supplement: Supplementary file 3 [file supplementary]

# T8 Sensitivity analysis for Mental SPH, interactions using different cut-off points for Human Development Index.

| Mental Self-Perceived Health |               |               |               |               |               |               |               |               |
|------------------------------|---------------|---------------|---------------|---------------|---------------|---------------|---------------|---------------|
| Females                      |               |               |               |               | Males         |               |               |               |
|                              | Model 1       | Model 2       | Model 3       | Model 4       | Model 5       | Model 6       | Model 7       | Model 8       |
| 2nd quartile                 | 0.52          | 0.52          | 0.53          | 0.55          | 0.89          | 0.88          | 0.89          | 0.88          |
| [28;34[                      | [0.27; 1.03]  | [0.27; 1.03]  | [0.27; 1.05]  | [0.28; 1.10]  | [0.50; 1.56]  | [0.50; 1.55]  | [0.50; 1.57]  | [0.50; 1.56]  |
| 3rd quartile                 | 0.63          | 0.63          | 0.62          | 0.65          | 1.02          | 1.01          | 1.02          | 1.02          |
| [34;44[                      | [0.34; 1.16]  | [0.34; 1.16]  | [0.34; 1.16]  | [0.35; 1.20]  | [0.58; 1.77]  | [0.58; 1.75]  | [0.58; 1.77]  | [0.58; 1.77]  |
| 4th quartile                 | 0.59          | 0.59          | 0.59          | 0.63          | 0.85          | 0.84          | 0.85          | 0.85          |
| [44;85]                      | [0.32; 1.10]  | [0.31; 1.09]  | [0.32; 1.11]  | [0.34; 1.19]  | [0.47; 1.54]  | [0.46; 1.53]  | [0.47; 1.55]  | [0.47; 1.55]  |
| Switzerland                  | 4.66          | 4.60          | 5.03          | 5.52          | 2.49          | 2.57          | 2.55          | 2.37          |
|                              | [0.60; 36.39] | [0.59; 35.67] | [0.62; 40.67] | [0.66; 46.51] | [0.54; 11.59] | [0.55; 11.99] | [0.54; 12.00] | [0.49; 11.41] |
| Spain                        | 0.77          | 0.78          | 0.84          | 0.98          | 2.74          | 2.89          | 2.81          | 2.55          |
|                              | [0.22; 2.73]  | [0.22; 2.77]  | [0.23; 3.03]  | [0.26; 3.68]  | [0.77; 9.67]  | [0.81; 10.36] | [0.77; 10.23] | [0.68; 9.56]  |
| Turkey                       | 0.08*         | 0.08*         | 0.09*         | 0.10*         | 0.10*         | 0.11*         | 0.11*         | 0.10*         |
|                              | [0.02; 0.39]  | [0.02; 0.39]  | [0.02; 0.42]  | [0.02; 0.48]  | [0.02; 0.50]  | [0.02; 0.51]  | [0.02; 0.52]  | [0.02; 0.49]  |
| United Kingdom               | 0.31          | 0.31          | 0.33          | 0.36          | 0.89          | 0.92          | 0.90          | 0.85          |
|                              | [0.08; 1.25]  | [0.08; 1.24]  | [0.08; 1.32]  | [0.09; 1.50]  | [0.20; 3.95]  | [0.21; 4.12]  | [0.20; 4.05]  | [0.19; 3.90]  |
| Africa                       | 2.29          | 2.40          | 2.71          | 2.26          | 0.91          | 0.88          | 0.90          | 0.90          |
|                              | [0.51; 10.27] | [0.53; 10.85] | [0.58; 12.67] | [0.53; 9.66]  | [0.36; 2.30]  | [0.35; 2.25]  | [0.36; 2.21]  | [0.37; 2.23]  |
| America                      | 2.76          | 2.92          | 2.43          | 2.43          | 0.47          | 0.45          | 0.48          | 0.52          |
|                              | [0.53; 14.31] | [0.56; 15.29] | [0.45; 13.27] | [0.45; 12.97] | [0.14; 1.63]  | [0.13; 1.58]  | [0.12; 1.88]  | [0.14; 1.99]  |
| Asia                         | 3.98          | 4.34          | 3.81          | 3.62          | 1.73          | 1.72          | 1.77          | 1.75          |
|                              | [0.85; 1.03]  | [0.91; 1.03]  | [0.80; 1.05]  | [0.80; 1.10]  | [0.72; 1.56]  | [0.71; 1.55]  | [0.71; 1.57]  | [0.73; 1.56]  |

| Mental Self-Perceived Health                                                                                                             |            |            |            |            |            |            |            |            |
|------------------------------------------------------------------------------------------------------------------------------------------|------------|------------|------------|------------|------------|------------|------------|------------|
|                                                                                                                                          | Females    |            |            |            | Males      |            |            |            |
|                                                                                                                                          | Model<br>1 | Model<br>2 | Model<br>3 | Model<br>4 | Model<br>5 | Model<br>6 | Model<br>7 | Model<br>8 |
| Europe                                                                                                                                   | 18.57]     | 20.69]     | 18.13]     | 16.30]     | 4.18]      | 4.16]      | 4.40]      | 4.16]      |
|                                                                                                                                          | 2.51       | 2.60       | 2.16       | 1.84       | 0.91       | 0.90       | 0.94       | 1.02       |
|                                                                                                                                          | [0.49;     | [0.50;     | [0.40;     | [0.31;     | [0.25;     | [0.25;     | [0.23;     | [0.24;     |
|                                                                                                                                          | 12.93]     | 13.50]     | 11.74]     | 10.79]     | 3.33]      | 3.29]      | 3.84]      | 4.30]      |
|                                                                                                                                          | 3.47       | 3.73       | 3.09       | 3.07       | 0.99       | 0.96       | 1.01       | 1.04       |
| Maghreb                                                                                                                                  | [0.61;     | [0.65;     | [0.51;     | [0.55;     | [0.33;     | [0.32;     | [0.29;     | [0.34;     |
|                                                                                                                                          | 19.67]     | 21.45]     | 18.61]     | 17.12]     | 3.00]      | 2.92]      | 3.50]      | 3.21]      |
|                                                                                                                                          | 0.78       | 0.79       | 0.77       | 0.80       | 0.70       | 0.71       | 0.71       | 0.71       |
| Undocumented                                                                                                                             | [0.49;     | [0.49;     | [0.48;     | [0.50;     | [0.46;     | [0.46;     | [0.46;     | [0.46;     |
|                                                                                                                                          | 1.24]      | 1.26]      | 1.23]      | 1.28]      | 1.09]      | 1.09]      | 1.09]      | 1.09]      |
|                                                                                                                                          | 0.75       | 0.76       | 0.76       | 0.78       | 0.54*      | 0.54*      | 0.54*      | 0.54*      |
| Asylum Seeker                                                                                                                            | [0.45;     | [0.45;     | [0.46;     | [0.47;     | [0.32;     | [0.32;     | [0.32;     | [0.32;     |
|                                                                                                                                          | 1.25]      | 1.27]      | 1.27]      | 1.31]      | 0.91]      | 0.91]      | 0.91]      | 0.90]      |
|                                                                                                                                          | 1.98*      | 1.97*      | 1.95*      | 2.00*      | 1.62*      | 1.61*      | 1.62*      | 1.63*      |
| Stable<br>Accommodation                                                                                                                  | [1.25;     | [1.25;     | [1.23;     | [1.26;     | [1.06;     | [1.06;     | [1.06;     | [1.07;     |
|                                                                                                                                          | 3.13]      | 3.11]      | 3.09]      | 3.18]      | 2.47]      | 2.46]      | 2.47]      | 2.49]      |
|                                                                                                                                          | 1.20       | 1.20       | 1.23       | 1.24       | 0.44*      | 0.44*      | 0.44*      | 0.44*      |
| Income<br>satisfaction<br>Enough                                                                                                         | [0.67;     | [0.67;     | [0.68;     | [0.69;     | [0.20;     | [0.20;     | [0.20;     | [0.20;     |
|                                                                                                                                          | 2.17]      | 2.17]      | 2.22]      | 2.24]      | 0.96]      | 0.95]      | 0.96]      | 0.96]      |
|                                                                                                                                          | 1.53       | 1.53       | 1.50       | 1.50       | 2.10*      | 2.12*      | 2.11*      | 2.11*      |
| Job                                                                                                                                      | [0.92;     | [0.92;     | [0.90;     | [0.90;     | [1.30;     | [1.31;     | [1.30;     | [1.30;     |
|                                                                                                                                          | 2.54]      | 2.54]      | 2.49]      | 2.50]      | 3.41]      | 3.45]      | 3.42]      | 3.42]      |
|                                                                                                                                          | 1.78       | 1.77       | 1.82       | 1.83       | 1.63       | 1.63       | 1.63       | 1.63       |
| Not Covered                                                                                                                              | [0.75;     | [0.74;     | [0.76;     | [0.76;     | [0.71;     | [0.71;     | [0.71;     | [0.71;     |
|                                                                                                                                          | 4.24]      | 4.23]      | 4.34]      | 4.36]      | 3.74]      | 3.76]      | 3.75]      | 3.75]      |
|                                                                                                                                          | 0.90       | 1.29       |            |            | 1.02       | 1.38       |            |            |
| Effect of stays<br>longer than 3<br>months <u>vs</u> stays<br>shorter than 3<br>months <u>when</u><br>women are from<br>poorer countries | [0.41;     | [0.36;     |            |            | [0.55;     | [0.42;     |            |            |
|                                                                                                                                          | 1.97]      | 4.6]       |            |            | 1.88]      | 4.53]      |            |            |
|                                                                                                                                          | 0.73       |            |            |            | 0.75       |            |            |            |
| Effect of stays<br>longer than 3<br>months vs stays                                                                                      | [0.39;     | [0.34;     | [0.38;     | [0.48;     | [0.41;     | [0.33;     | [0.39;     | [0.38;     |
|                                                                                                                                          | 1.38]      | 2.94]      | 1.93]      | 2]         | 1.36]      | 2.89]      | 1.61]      | 1.36]      |
|                                                                                                                                          |            |            |            |            |            |            |            |            |

| Mental Self-Perceived Health                                                                                                              |            |                 |                |                  |             |                 |                 |                 |
|-------------------------------------------------------------------------------------------------------------------------------------------|------------|-----------------|----------------|------------------|-------------|-----------------|-----------------|-----------------|
|                                                                                                                                           | Females    |                 |                |                  |             | Males           |                 |                 |
|                                                                                                                                           | Model<br>1 | Model<br>2      | Model<br>3     | Model<br>4       | Model<br>5  | Model<br>6      | Model<br>7      | Model<br>8      |
| shorter than 3<br>months when<br>women are from<br>rich countries<br>(HDI cut 0.5)                                                        |            | 0.62            |                |                  |             | 0.67            |                 |                 |
| Effect of wealthy<br>origin vs poor<br>origin HDI cut at<br>0.6                                                                           |            | [0.29;<br>1.33] |                |                  |             | [0.33;<br>1.34] |                 |                 |
| Effect of stays<br>longer than 3<br>months vs stays<br>shorter than 3<br>months when<br>women are from<br>rich countries<br>(HDI cut 0.6) |            |                 | 1.86           |                  |             |                 | 1.08            |                 |
|                                                                                                                                           |            |                 | [0.47;<br>7.4] |                  |             |                 | [0.3;<br>3.9]   |                 |
| Effect of wealthy<br>origin vs poor<br>origin HDI cut at<br>0.7                                                                           |            |                 | 0.54           |                  |             |                 | 0.68            |                 |
|                                                                                                                                           |            |                 | [0.2;<br>1.45] |                  |             |                 | [0.26;<br>1.84] |                 |
| Effect of stays<br>longer than 3<br>months vs stays<br>shorter than 3<br>months when<br>women are from<br>rich countries<br>(HDI cut 0.7) |            |                 |                | 4.11             |             |                 |                 | 0.74            |
|                                                                                                                                           |            |                 |                | [0.86;<br>19.58] |             |                 |                 | [0.17;<br>3.31] |
|                                                                                                                                           |            |                 |                | 0.20             |             |                 |                 | 0.90            |
|                                                                                                                                           |            |                 |                | [0.05;<br>0.84]  |             |                 |                 | [0.23;<br>3.58] |
| AIC                                                                                                                                       | 610.54     | 612.02          | 611.83         | 608.45           | 698.89      | 700.55          | 700.82          | 700.71          |
| BIC                                                                                                                                       | 702.09     | 707.93          | 707.75         | 704.36           | 796.52      | 802.83          | 803.10          | 802.99          |
| Log Likelihood                                                                                                                            | -284.27    | -<br>284.01     | -<br>283.92    | -<br>282.22      | -<br>328.45 | -<br>328.28     | -<br>328.41     | -<br>328.35     |

| Mental Self-Perceived Health |            |            |            |            |            |            |            |            |
|------------------------------|------------|------------|------------|------------|------------|------------|------------|------------|
|                              | Females    |            |            |            |            | Males      |            |            |
|                              | Model<br>1 | Model<br>2 | Model<br>3 | Model<br>4 | Model<br>5 | Model<br>6 | Model<br>7 | Model<br>8 |
| Deviance                     | 568.54     | 568.02     | 567.83     | 564.45     | 656.89     | 656.55     | 656.82     | 656.71     |
| Num. obs.                    | 578        | 578        | 578        | 578        | 772        | 772        | 772        | 772        |

\* 1 outside the confidence interval

Statistical models
