# Supplementary material for: Self-Perceived Health Among Migrants Seen in M&eacute;decins du Monde Free Clinics in Europe: Impact of Length of Stay and Wealth of Country of Origin on Migrants&rsquo; Health
Source: Preprints.org preprint supplement (doi:10.20944/preprints201906.0090.v1), 2019-06-11
Supplement: Supplementary file 4 [file supplementary]

# T6 Full Results for Mental SPH with and without interaction.

| Mental Health        |                |             |                |             |
|----------------------|----------------|-------------|----------------|-------------|
| Female               |                | Male        |                |             |
|                      | No interaction | Interaction | No interaction | Interaction |
| Age group            |                |             |                |             |
| 1st quartile [18;28[ | Ref            | Ref         | Ref            | Ref         |
|                      | 0.52 [0.27;    | 0.52 [0.27; | 0.89 [0.50;    | 0.88 [0.50; |
| 2nd quartile [28;34[ | 1.03]          | 1.03]       | 1.56]          | 1.55]       |
|                      | 0.63 [0.34;    | 0.63 [0.34; | 1.02 [0.58;    | 1.01 [0.58; |
| 3rd quartile [34;44[ | 1.16]          | 1.16]       | 1.77]          | 1.75]       |
|                      | 0.59 [0.32;    | 0.59 [0.31; | 0.85 [0.47;    | 0.84 [0.46; |
| 4th quartile [44;85] | 1.10]          | 1.09]       | 1.54]          | 1.53]       |
| Surveyed Countries   |                |             |                |             |
| Germany              | Ref            | Ref         | Ref            | Ref         |
|                      | 4.66 [0.60;    | 4.60 [0.59; | 2.49 [0.54;    | 2.57 [0.55; |
| Switzerland          | 36.39]         | 35.67]      | 11.59]         | 11.99]      |
|                      | 0.77 [0.22;    | 0.78 [0.22; | 2.74 [0.77;    | 2.89 [0.81; |
| Spain                | 2.73]          | 2.77]       | 9.67]          | 10.36]      |
|                      | 0.08 [0.02;    | 0.08 [0.02; | 0.10 [0.02;    | 0.11 [0.02; |
| Turkey               | 0.39]*         | 0.39]*      | 0.50]*         | 0.51]*      |
|                      | 0.31 [0.08;    | 0.31 [0.08; | 0.89 [0.20;    | 0.92 [0.21; |
| United Kingdom       | 1.25]          | 1.24]       | 3.95]          | 4.12]       |
| Region of Origin     |                |             |                |             |
| Middle East          | Ref            | Ref         | Ref            | Ref         |
|                      | 2.29 [0.51;    | 2.40 [0.53; | 0.91 [0.36;    | 0.88 [0.35; |
| Africa               | 10.27]         | 10.85]      | 2.30]          | 2.25]       |
|                      | 2.76 [0.53;    | 2.92 [0.56; | 0.47 [0.14;    | 0.45 [0.13; |
| America              | 14.31]         | 15.29]      | 1.63]          | 1.58]       |
|                      | 3.98 [0.85;    | 4.34 [0.91; | 1.73 [0.72;    | 1.72 [0.71; |
| Asia                 | 18.57]         | 20.69]      | 4.18]          | 4.16]       |
|                      | 2.51 [0.49;    | 2.60 [0.50; | 0.91 [0.25;    | 0.90 [0.25; |
| Europe               | 12.93]         | 13.50]      | 3.33]          | 3.29]       |
|                      | 3.47 [0.61;    | 3.73 [0.65; | 0.99 [0.33;    | 0.96 [0.32; |
| Maghreb              | 19.67]         | 21.45]      | 3.00]          | 2.92]       |
| Immigration Status   |                |             |                |             |
| Residence permit     | Ref            | Ref         | Ref            | Ref         |
|                      | 0.78 [0.49;    | 0.79 [0.49; | 0.70 [0.46;    | 0.71 [0.46; |
| Undocumented         | 1.24]          | 1.26]       | 1.09]          | 1.09]       |
|                      | 0.75 [0.45;    | 0.76 [0.45; | 0.54 [0.32;    | 0.54 [0.32; |
| Asylum Seeker        | 1.25]          | 1.27]       | 0.91]*         | 0.91]*      |
| Housing conditions   |                |             |                |             |

| Mental Health                              |                |             |                |             |
|--------------------------------------------|----------------|-------------|----------------|-------------|
|                                            | Female         |             | Male           |             |
|                                            | No interaction | Interaction | No interaction | Interaction |
| Instable                                   | Ref            | Ref         | Ref            | Ref         |
|                                            | 1.98 [1.25;    | 1.97 [1.25; | 1.62 [1.06;    | 1.61 [1.06; |
| Stable                                     | 3.13]*         | 3.11]*      | 2.47]*         | 2.46]*      |
| Income satisfaction                        |                |             |                |             |
| Not Enough                                 | Ref            | Ref         | Ref            | Ref         |
|                                            | 1.20 [0.67;    | 1.20 [0.67; | 0.44 [0.20;    | 0.44 [0.20; |
| Enough                                     | 2.17]          | 2.17]       | 0.96]*         | 0.95]*      |
| Job                                        |                |             |                |             |
| No                                         | Ref            | Ref         | Ref            | Ref         |
|                                            | 1.53 [0.92;    | 1.53 [0.92; | 2.10 [1.30;    | 2.12 [1.31; |
| Yes                                        | 2.54]          | 2.54]       | 3.41]*         | 3.45]*      |
| Insurance coverage                         |                |             |                |             |
| Yes                                        | Ref            | Ref         | Ref            | Ref         |
|                                            | 1.78 [0.75;    | 1.77 [0.74; | 1.63 [0.71;    | 1.63 [0.71; |
| No                                         | 4.24]          | 4.23]       | 3.74]          | 3.76]       |
| Length of Stay and Human Development Index |                |             |                |             |
| Human Development Index above 0.5          | 0.90 [0.41;    | 1.29 [0.35; | 1.02 [0.55;    | 1.38 [0.41; |
|                                            | 1.97]          | 4.72]       | 1.88]          | 4.64]       |
| LOS <3 months                              | 0.73 [0.39;    | 1.00 [0.33; | 0.75 [0.41;    | 0.98 [0.32; |
|                                            | 1.38]          | 3.00]       | 1.36]          | 2.96]       |
| Interaction                                |                | 0.62 [0.16; |                | 0.68 [0.18; |
|                                            |                | 2.35]       |                | 2.54]       |
| AIC                                        | 610.54         | 612.02      | 698.89         | 700.55      |
| BIC                                        | 702.09         | 707.93      | 796.52         | 802.83      |
| Log Likelihood                             | -284.27        | -284.01     | -328.45        | -328.28     |
| Deviance                                   | 568.54         | 568.02      | 656.89         | 656.55      |
| Num. obs.                                  | 578            | 578         | 772            | 772         |

\* 1 outside the confidence interval

Statistical models
