# Supplementary material for: Self-Perceived Health Among Migrants Seen in M&eacute;decins du Monde Free Clinics in Europe: Impact of Length of Stay and Wealth of Country of Origin on Migrants&rsquo; Health
Source: Preprints.org preprint supplement (doi:10.20944/preprints201906.0090.v1), 2019-06-11
Supplement: Supplementary file 5 [file supplementary]

# T7 Sensitivity analysis for Physical SPH, interactions using different cut-off points for Human Development Index.

| Physical Self-Perceived Health |                          |                          |                          |                          |                          |                          |                          |                          |
|--------------------------------|--------------------------|--------------------------|--------------------------|--------------------------|--------------------------|--------------------------|--------------------------|--------------------------|
|                                | Females                  |                          |                          |                          | Males                    |                          |                          |                          |
|                                | Model 1                  | Model 2                  | Model 3                  | Model 4                  | Model 5                  | Model 6                  | Model 7                  | Model 8                  |
| 2nd quartile<br>[28;34[        | 1.05<br>[0.59;<br>1.87]  | 1.05<br>[0.58;<br>1.88]  | 1.09<br>[0.61;<br>1.96]  | 1.13<br>[0.63;<br>2.03]  | 0.91<br>[0.59;<br>1.40]  | 0.91<br>[0.59;<br>1.40]  | 0.88<br>[0.58;<br>1.36]  | 0.90<br>[0.58;<br>1.37]  |
| 3rd quartile<br>[34;44[        | 0.63<br>[0.35;<br>1.15]  | 0.64<br>[0.35;<br>1.16]  | 0.66<br>[0.36;<br>1.20]  | 0.68<br>[0.37;<br>1.24]  | 0.62*<br>[0.40;<br>0.97] | 0.62*<br>[0.40;<br>0.97] | 0.60*<br>[0.38;<br>0.94] | 0.61*<br>[0.39;<br>0.95] |
| 4th quartile<br>[44;85]        | 0.65<br>[0.35;<br>1.21]  | 0.65<br>[0.35;<br>1.21]  | 0.67<br>[0.36;<br>1.27]  | 0.71<br>[0.38;<br>1.34]  | 0.63<br>[0.37;<br>1.10]  | 0.63<br>[0.37;<br>1.10]  | 0.63<br>[0.36;<br>1.10]  | 0.64<br>[0.37;<br>1.11]  |
| Switzerland                    | 5.56<br>[0.73;<br>42.37] | 6.10<br>[0.80;<br>46.32] | 6.36<br>[0.79;<br>50.96] | 6.83<br>[0.83;<br>56.21] | 1.15<br>[0.27;<br>4.82]  | 1.15<br>[0.27;<br>4.84]  | 1.02<br>[0.24;<br>4.30]  | 0.92<br>[0.21;<br>3.97]  |
| Spain                          | 0.55<br>[0.14;<br>2.12]  | 0.60<br>[0.15;<br>2.31]  | 0.66<br>[0.17;<br>2.60]  | 0.78<br>[0.19;<br>3.24]  | 2.18<br>[0.72;<br>6.57]  | 2.19<br>[0.72;<br>6.67]  | 1.63<br>[0.52;<br>5.10]  | 1.55<br>[0.48;<br>4.97]  |
| Turkey                         | 0.91<br>[0.19;<br>4.37]  | 0.97<br>[0.20;<br>4.70]  | 0.96<br>[0.20;<br>4.71]  | 1.07<br>[0.21;<br>5.39]  | 1.64<br>[0.42;<br>6.50]  | 1.65<br>[0.42;<br>6.52]  | 1.39<br>[0.35;<br>5.54]  | 1.28<br>[0.31;<br>5.19]  |
| United Kingdom                 | 0.39<br>[0.09;<br>1.68]  | 0.40<br>[0.09;<br>1.75]  | 0.42<br>[0.10;<br>1.88]  | 0.47<br>[0.10;<br>2.16]  | 0.63<br>[0.16;<br>2.48]  | 0.63<br>[0.16;<br>2.50]  | 0.53<br>[0.13;<br>2.11]  | 0.51<br>[0.13;<br>2.05]  |
| Africa                         | 3.47<br>[0.87;<br>13.78] | 3.64<br>[0.92;<br>14.36] | 3.52<br>[0.86;<br>14.41] | 2.81<br>[0.73;<br>10.87] | 1.37<br>[0.57;<br>3.29]  | 1.37<br>[0.57;<br>3.29]  | 1.26<br>[0.53;<br>3.00]  | 1.26<br>[0.53;<br>2.98]  |
| America                        | 7.65*                    | 8.14*                    | 6.09*                    | 6.10*                    | 0.74                     | 0.73                     | 1.08                     | 1.13                     |

| Physical Self-Perceived Health                         |               |               |               |               |              |              |              |               |
|--------------------------------------------------------|---------------|---------------|---------------|---------------|--------------|--------------|--------------|---------------|
|                                                        | Females       |               |               |               | Males        |              |              |               |
|                                                        | Model 1       | Model 2       | Model 3       | Model 4       | Model 5      | Model 6      | Model 7      | Model 8       |
| Asia                                                   | [1.56; 37.47] | [1.67; 39.64] | [1.12; 33.03] | [1.17; 31.81] | [0.22; 2.43] | [0.22; 2.43] | [0.29; 4.02] | [0.31; 4.13]  |
|                                                        | 3.06          | 3.48          | 3.08          | 3.27          | 1.99         | 1.99         | 2.34         | 2.27          |
|                                                        | [0.68; 13.70] | [0.78; 15.57] | [0.65; 14.70] | [0.74; 14.42] | [0.77; 5.12] | [0.77; 5.12] | [0.88; 6.20] | [0.89; 5.83]  |
| Europe                                                 | 2.38          | 2.37          | 1.75          | 1.30          | 1.55         | 1.55         | 2.05         | 2.44          |
|                                                        | [0.45; 12.50] | [0.45; 12.41] | [0.30; 10.16] | [0.21; 8.26]  | [0.43; 5.61] | [0.43; 5.60] | [0.51; 8.21] | [0.58; 10.23] |
| Maghreb                                                | 3.94          | 4.29          | 3.16          | 3.81          | 1.73         | 1.73         | 2.42         | 2.29          |
|                                                        | [0.73; 21.18] | [0.80; 22.88] | [0.53; 18.79] | [0.71; 20.52] | [0.59; 5.10] | [0.59; 5.10] | [0.73; 8.01] | [0.76; 6.92]  |
| Undocumented                                           | 0.86          | 0.88          | 0.86          | 0.92          | 0.89         | 0.89         | 0.90         | 0.90          |
| Asylum Seeker                                          | [0.55; 1.36]  | [0.56; 1.39]  | [0.54; 1.35]  | [0.58; 1.45]  | [0.61; 1.31] | [0.61; 1.31] | [0.61; 1.32] | [0.61; 1.31]  |
|                                                        | 0.68          | 0.69          | 0.63          | 0.65          | 0.56*        | 0.56*        | 0.53*        | 0.53*         |
|                                                        | [0.42; 1.10]  | [0.43; 1.13]  | [0.39; 1.02]  | [0.40; 1.05]  | [0.36; 0.86] | [0.36; 0.86] | [0.34; 0.82] | [0.34; 0.81]  |
| Stable Accomodation                                    | 1.76*         | 1.77*         | 1.73*         | 1.78*         | 1.27         | 1.27         | 1.31         | 1.30          |
| Income satisfaction Enough                             | [1.15; 2.69]  | [1.16; 2.71]  | [1.13; 2.65]  | [1.16; 2.71]  | [0.90; 1.81] | [0.90; 1.81] | [0.92; 1.86] | [0.92; 1.85]  |
|                                                        | 1.36          | 1.35          | 1.46          | 1.49          | 0.94         | 0.94         | 0.95         | 0.94          |
|                                                        | [0.74; 2.53]  | [0.73; 2.50]  | [0.79; 2.72]  | [0.80; 2.78]  | [0.44; 1.98] | [0.44; 1.98] | [0.45; 2.01] | [0.44; 1.99]  |
| Job                                                    | 1.37          | 1.39          | 1.30          | 1.34          | 1.90*        | 1.90*        | 1.86*        | 1.86*         |
|                                                        | [0.86; 2.17]  | [0.87; 2.21]  | [0.82; 2.05]  | [0.85; 2.13]  | [1.30; 2.76] | [1.30; 2.76] | [1.28; 2.71] | [1.28; 2.70]  |
| Not Covered                                            | 1.44          | 1.42          | 1.43          | 1.43          | 0.67         | 0.67         | 0.64         | 0.67          |
|                                                        | [0.58; 3.59]  | [0.57; 3.53]  | [0.57; 3.57]  | [0.57; 3.55]  | [0.29; 1.54] | [0.29; 1.54] | [0.28; 1.49] | [0.29; 1.56]  |
| Effect of wealthy origin vs poor origin HDI cut at 0.5 | 1.94*         |               |               |               | 1.41         |              |              |               |
|                                                        |               | 5.96*         |               |               |              | 1.46         |              |               |
|                                                        | [1.06; 3.56]  | [1.65; 21.49] |               |               | [0.93; 2.13] | [0.62; 3.43] |              |               |

| Physical Self-Perceived Health                                                                                                     |              |               |              |               |              |              |              |              |
|------------------------------------------------------------------------------------------------------------------------------------|--------------|---------------|--------------|---------------|--------------|--------------|--------------|--------------|
|                                                                                                                                    | Females      |               |              |               |              | Males        |              |              |
|                                                                                                                                    | Model 1      | Model 2       | Model 3      | Model 4       | Model 5      | Model 6      | Model 7      | Model 8      |
| Effect of stays longer than 3 months <u>vs</u> stays shorter than 3 months <u>when</u> women are from poorer countries             | 1.96*        | 4.72*         | 2.94*        | 2.78*         | 0.79         | 0.81         | 0.57*        | 0.65         |
|                                                                                                                                    | [1.05; 3.65] |               |              |               | [0.50; 1.25] |              |              |              |
|                                                                                                                                    |              | [1.51; 14.72] | [1.35; 6.39] | [1.38; 5.6]   |              | [0.38; 1.73] | [0.35; 0.95] | [0.4; 1.05]  |
| Effect of stays longer than 3 months <u>vs</u> stays shorter than 3 months <u>when</u> women are from rich countries (HDI cut 0.5) |              | 1.22          |              |               |              | 0.77         |              |              |
|                                                                                                                                    |              | [0.59; 2.55]  |              |               |              | [0.45; 1.35] |              |              |
| Effect of wealthy origin <u>vs</u> poor origin HDI cut at 0.6                                                                      |              |               | 4.71*        |               |              |              | 0.28*        |              |
|                                                                                                                                    |              |               | [1.1; 20.25] |               |              |              | [0.09; 0.94] |              |
| Effect of stays longer than 3 months <u>vs</u> stays shorter than 3 months <u>when</u> women are from rich countries (HDI cut 0.6) |              |               | 0.92         |               |              |              | 2.09         |              |
|                                                                                                                                    |              |               | [0.34; 2.48] |               |              |              | [0.77; 5.69] |              |
| Effect of wealthy origin <u>vs</u> poor origin HDI cut at 0.7                                                                      |              |               |              | 8.48*         |              |              |              | 0.26*        |
|                                                                                                                                    |              |               |              | [1.78; 40.45] |              |              |              | [0.07; 1.07] |
| Effect of stays                                                                                                                    |              |               |              | 0.38          |              |              |              | 2.09         |

| Physical Self-Perceived Health                                                                                            |             |             |             |                 |            |            |            |                 |
|---------------------------------------------------------------------------------------------------------------------------|-------------|-------------|-------------|-----------------|------------|------------|------------|-----------------|
|                                                                                                                           | Females     |             |             |                 | Males      |            |            |                 |
|                                                                                                                           | Model<br>1  | Model<br>2  | Model<br>3  | Model<br>4      | Model<br>5 | Model<br>6 | Model<br>7 | Model<br>8      |
| longer than 3<br>months vs<br>stays shorter<br>than 3 months<br>when women<br>are from rich<br>countries (HDI<br>cut 0.7) |             |             |             | [0.09;<br>1.55] |            |            |            | [0.56;<br>7.86] |
| AIC                                                                                                                       | 669.98      | 667.57      | 672.28      | 669.45          | 937.37     | 939.36     | 936.38     | 938.14          |
| BIC                                                                                                                       | 761.57      | 763.52      | 768.23      | 765.40          | 1035.05    | 1041.69    | 1038.71    | 1040.47         |
| Log Likelihood                                                                                                            | -<br>313.99 | -<br>311.79 | -<br>314.14 | -<br>312.72     | -447.68    | -447.68    | -446.19    | -447.07         |
| Deviance                                                                                                                  | 627.98      | 623.57      | 628.28      | 625.45          | 895.37     | 895.36     | 892.38     | 894.14          |
| Num. obs.                                                                                                                 | 579         | 579         | 579         | 579             | 774        | 774        | 774        | 774             |

\* 1 outside the confidence interval

Statistical models
