# Supplementary material for: Self-Perceived Health Among Migrants Seen in M&eacute;decins du Monde Free Clinics in Europe: Impact of Length of Stay and Wealth of Country of Origin on Migrants&rsquo; Health
Source: Preprints.org preprint supplement (doi:10.20944/preprints201906.0090.v1), 2019-06-11
Supplement: Supplementary file 6 [file supplementary]

# T1 Women Physical Health

Sensitivity analysis for physical SPH, for women; SA1 shows results for Length of Stay (LOS) below and above 3 months; SA2 show results for LOS below 3 months, below 10 years and above 3 months, above 10 years; SA3 shows results for LOS below 3 months, below 5 years and above 3 months, above 5 years; Finally, SA4 shows results for LOS below 3 months, below 5 years and above 3 months, above 5 years and below 10 years, above 10 years.

| Physical Health      |                              |                              |                              |                              |
|----------------------|------------------------------|------------------------------|------------------------------|------------------------------|
| Women                |                              |                              |                              |                              |
|                      | SA 1                         | SA 2                         | SA 3                         | SA 4                         |
| Age group            |                              |                              |                              |                              |
| 1st quartile [18;28[ | Ref<br>1.08 [0.62;<br>1.91]  | Ref<br>1.08 [0.62;<br>1.91]  | Ref<br>1.07 [0.61;<br>1.90]  | Ref<br>1.08 [0.61;<br>1.91]  |
| 2nd quartile [28;34[ | 0.66 [0.37;<br>1.18]         | 0.66 [0.37;<br>1.19]         | 0.65 [0.36;<br>1.17]         | 0.65 [0.36;<br>1.17]         |
| 3rd quartile [34;44[ | 0.67 [0.36;<br>1.24]         | 0.71 [0.38;<br>1.33]         | 0.66 [0.35;<br>1.23]         | 0.69 [0.37;<br>1.29]         |
| 4th quartile [44;85] |                              |                              |                              |                              |
| Surveyed Countries   |                              |                              |                              |                              |
| Germany              | Ref<br>6.32 [0.81;<br>51.76] | Ref<br>6.41 [0.82;<br>52.89] | Ref<br>6.27 [0.81;<br>51.34] | Ref<br>6.35 [0.82;<br>52.22] |
| Switzerland          | 0.55 [0.15;<br>2.14]         | 0.55 [0.15;<br>2.14]         | 0.53 [0.14;<br>2.12]         | 0.52 [0.13;<br>2.06]         |
| Spain                | 0.93 [0.20;<br>4.50]         | 0.93 [0.20;<br>4.53]         | 0.91 [0.19;<br>4.45]         | 0.90 [0.19;<br>4.41]         |
| Turkey               | 0.39 [0.09;<br>1.70]         | 0.40 [0.09;<br>1.76]         | 0.38 [0.09;<br>1.68]         | 0.38 [0.09;<br>1.67]         |
| United Kingdom       |                              |                              |                              |                              |
| Region of Origin     |                              |                              |                              |                              |
| Middle East          | Ref<br>2.89 [0.86;<br>13.48] | Ref<br>2.94 [0.88;<br>13.72] | Ref<br>2.87 [0.85;<br>13.37] | Ref<br>2.86 [0.85;<br>13.35] |
| Africa               | 9.17 [2.12;<br>50.68]*       | 9.41 [2.17;<br>52.17]*       | 9.15 [2.12;<br>50.56]*       | 9.58 [2.21;<br>53.13]*       |
| America              | 3.78 [0.97;<br>19.33]        | 3.78 [0.97;<br>19.34]        | 3.73 [0.96;<br>19.14]        | 3.66 [0.94;<br>18.79]        |
| Asia                 | 2.77 [0.58;<br>16.00]        | 2.85 [0.60;<br>16.49]        | 2.75 [0.58;<br>15.91]        | 2.80 [0.59;<br>16.22]        |
| Europe               | 4.19 [0.85;<br>25.14]        | 4.50 [0.91;<br>27.17]        | 4.14 [0.84;<br>24.91]        | 4.35 [0.88;<br>26.30]        |
| Maghreb              |                              |                              |                              |                              |
| Housing conditions   |                              |                              |                              |                              |
| Instable             | Ref                          | Ref                          | Ref                          | Ref                          |

|                                                           |                             |                             |                             |                             |
|-----------------------------------------------------------|-----------------------------|-----------------------------|-----------------------------|-----------------------------|
| Stable                                                    | 1.79 [1.19;<br>2.71]*       | 1.79 [1.19;<br>2.71]*       | 1.78 [1.18;<br>2.70]*       | 1.77 [1.17;<br>2.68]*       |
| Income satisfaction                                       |                             |                             |                             |                             |
| Not Enough                                                | Ref<br>1.39 [0.76;<br>2.54] | Ref<br>1.38 [0.75;<br>2.52] | Ref<br>1.39 [0.76;<br>2.54] | Ref<br>1.36 [0.74;<br>2.49] |
| Enough                                                    |                             |                             |                             |                             |
| Job                                                       |                             |                             |                             |                             |
| No                                                        | Ref<br>1.33 [0.85;<br>2.07] | Ref<br>1.33 [0.85;<br>2.09] | Ref<br>1.32 [0.84;<br>2.06] | Ref<br>1.31 [0.83;<br>2.05] |
| Yes                                                       |                             |                             |                             |                             |
| Insurance coverage                                        |                             |                             |                             |                             |
| Yes                                                       | Ref<br>1.36 [0.58;<br>3.58] | Ref<br>1.36 [0.58;<br>3.59] | Ref<br>1.38 [0.59;<br>3.66] | Ref<br>1.43 [0.60;<br>3.78] |
| No                                                        |                             |                             |                             |                             |
| Immigration Status                                        |                             |                             |                             |                             |
| Residence permit                                          | Ref<br>0.69 [0.38;<br>1.25] | Ref<br>0.68 [0.38;<br>1.23] | Ref<br>0.70 [0.39;<br>1.28] | Ref<br>0.69 [0.38;<br>1.25] |
| Undocumented                                              | 0.50 [0.27;<br>0.93]*       | 0.48 [0.26;<br>0.91]*       | 0.50 [0.27;<br>0.94]*       | 0.48 [0.25;<br>0.90]*       |
| Asylum Seeker                                             |                             |                             |                             |                             |
| <b>Length of Stay</b>                                     |                             |                             |                             |                             |
| <b>Sensitivity Analysis 1</b>                             |                             |                             |                             |                             |
| Length of Stay below 3 months                             | Ref                         |                             |                             |                             |
| Length of Stay above 3 months                             | 2.13 [1.17;<br>4.03]*       |                             |                             |                             |
| <b>Sensitivity Analysis 2</b>                             |                             |                             |                             |                             |
| Length of Stay below 3 months                             |                             | Ref                         |                             |                             |
| Length of Stay between 3months<br>and 10 years            |                             | 2.24 [1.23;<br>4.26]*       |                             |                             |
| Length of Stay above 10 years                             |                             | 1.54 [0.59;<br>3.94]        |                             |                             |
| <b>Sensitivity Analysis 3</b>                             |                             |                             |                             |                             |
| Length of Stay below 3 months                             |                             |                             | Ref                         |                             |
| Length of Stay between 3 months<br>and 5 years            |                             |                             | 2.10 [1.14;<br>4.01]*       |                             |
| Length of Stay above 5 years                              |                             |                             | 2.25 [1.08;<br>4.85]*       |                             |
| <b>Sensitivity Analysis 4</b>                             |                             |                             |                             |                             |
| Length of Stay below 3 months                             |                             |                             |                             | 0.38 [0.17;<br>0.83]*       |
| Length of Stay above three months<br>and Below five years |                             |                             |                             | 0.82 [0.47;<br>1.43]        |
| Length of Stay above 5 years and<br>less than 10 years    |                             |                             |                             | Ref                         |
| Length of Stay Above 10 years                             |                             |                             |                             | 0.61 [0.26;<br>1.38]        |
| AIC                                                       | 671.68                      | 673.51                      | 673.61                      | 674.23                      |

|                |         |         |         |         |
|----------------|---------|---------|---------|---------|
| BIC            | 758.91  | 765.13  | 765.20  | 770.18  |
| Log Likelihood | -315.84 | -315.75 | -315.81 | -315.11 |
| Deviance       | 631.68  | 631.51  | 631.61  | 630.23  |
| Num. obs.      | 579     | 580     | 579     | 579     |

---
