# Supplementary material for: Self-Perceived Health Among Migrants Seen in M&eacute;decins du Monde Free Clinics in Europe: Impact of Length of Stay and Wealth of Country of Origin on Migrants&rsquo; Health
Source: Preprints.org preprint supplement (doi:10.20944/preprints201906.0090.v1), 2019-06-11
Supplement: Supplementary file 7 [file supplementary]

# T2 Men Physical Health

Sensitivity analysis for physical SPH, for men; SA1 shows results for Length of Stay (LOS) below and above 3 months; SA2 show results for LOS below 3 months, below 10 years and above 3 months, above 10 years; SA3 shows results for LOS below 3 months, below 5 years and above 3 months, above 5 years; Finally, SA4 shows results for LOS below 3 months, below 5 years and above 3 months, above 5 years and below 10 years, above 10 years.

| Physical Health      |                             |                             |                             |                             |
|----------------------|-----------------------------|-----------------------------|-----------------------------|-----------------------------|
| Men                  |                             |                             |                             |                             |
|                      | SA 1                        | SA 2                        | SA 3                        | SA 4                        |
| Age group            |                             |                             |                             |                             |
| 1st quartile [18;28[ | Ref<br>0.90 [0.59;<br>1.37] | Ref<br>0.91 [0.60;<br>1.38] | Ref<br>0.92 [0.60;<br>1.40] | Ref<br>0.92 [0.60;<br>1.40] |
| 2nd quartile [28;34[ | 0.62 [0.40;<br>0.96]*       | 0.63 [0.41;<br>0.98]*       | 0.64 [0.41;<br>1.00]*       | 0.64 [0.41;<br>1.00]        |
| 3rd quartile [34;44[ | 0.63 [0.37;<br>1.08]        | 0.66 [0.38;<br>1.13]        | 0.65 [0.38;<br>1.13]        | 0.66 [0.38;<br>1.15]        |
| 4th quartile [44;85] |                             |                             |                             |                             |
| Surveyed Countries   |                             |                             |                             |                             |
| Germany              | Ref<br>1.17 [0.28;<br>4.90] | Ref<br>1.11 [0.26;<br>4.68] | Ref<br>1.12 [0.27;<br>4.71] | Ref<br>1.09 [0.26;<br>4.62] |
| Switzerland          | 2.10 [0.74;<br>6.62]        | 2.07 [0.73;<br>6.54]        | 2.14 [0.75;<br>6.76]        | 2.10 [0.73;<br>6.65]        |
| Spain                | 1.63 [0.43;<br>6.52]        | 1.53 [0.40;<br>6.18]        | 1.54 [0.40;<br>6.24]        | 1.50 [0.39;<br>6.10]        |
| Turkey               | 0.61 [0.16;<br>2.44]        | 0.60 [0.16;<br>2.38]        | 0.61 [0.16;<br>2.43]        | 0.60 [0.16;<br>2.39]        |
| United Kingdom       |                             |                             |                             |                             |
| Region of Origin     |                             |                             |                             |                             |
| Middle East          | Ref<br>1.21 [0.54;<br>2.95] | Ref<br>1.22 [0.54;<br>2.96] | Ref<br>1.20 [0.53;<br>2.92] | Ref<br>1.21 [0.53;<br>2.94] |
| Africa               | 0.77 [0.24;<br>2.49]        | 0.74 [0.23;<br>2.43]        | 0.75 [0.23;<br>2.44]        | 0.74 [0.23;<br>2.41]        |
| America              | 2.22 [0.92;<br>5.84]        | 2.19 [0.91;<br>5.78]        | 2.16 [0.89;<br>5.73]        | 2.17 [0.89;<br>5.73]        |
| Asia                 | 1.80 [0.51;<br>6.46]        | 1.78 [0.50;<br>6.36]        | 1.77 [0.50;<br>6.33]        | 1.76 [0.49;<br>6.31]        |
| Europe               | 1.91 [0.67;<br>5.65]        | 1.91 [0.67;<br>5.65]        | 1.92 [0.68;<br>5.68]        | 1.91 [0.67;<br>5.67]        |
| Maghreb              |                             |                             |                             |                             |
| Housing conditions   |                             |                             |                             |                             |
| Instable             | Ref<br>1.30 [0.92;<br>1.83] | Ref<br>1.29 [0.91;<br>1.82] | Ref<br>1.29 [0.91;<br>1.82] | Ref<br>1.29 [0.91;<br>1.82] |
| Stable               |                             |                             |                             |                             |
| Income satisfaction  |                             |                             |                             |                             |

| Physical Health                                           |                              |                              |                              |                              |
|-----------------------------------------------------------|------------------------------|------------------------------|------------------------------|------------------------------|
| Men                                                       |                              |                              |                              |                              |
|                                                           | SA 1                         | SA 2                         | SA 3                         | SA 4                         |
| Not Enough                                                | Ref<br>0.95 [0.45;<br>1.96]  | Ref<br>0.97 [0.45;<br>2.00]  | Ref<br>0.98 [0.46;<br>2.04]  | Ref<br>0.98 [0.46;<br>2.04]  |
| Enough                                                    |                              |                              |                              |                              |
| Job                                                       |                              |                              |                              |                              |
| No                                                        | Ref<br>1.81 [1.26;<br>2.61]* | Ref<br>1.82 [1.27;<br>2.63]* | Ref<br>1.82 [1.26;<br>2.62]* | Ref<br>1.82 [1.27;<br>2.63]* |
| Yes                                                       |                              |                              |                              |                              |
| Insurance coverage                                        |                              |                              |                              |                              |
| Yes                                                       | Ref<br>0.64 [0.29;<br>1.51]  | Ref<br>0.65 [0.29;<br>1.52]  | Ref<br>0.65 [0.29;<br>1.53]  | Ref<br>0.65 [0.29;<br>1.53]  |
| No                                                        |                              |                              |                              |                              |
| Immigration Status                                        |                              |                              |                              |                              |
| Residence permit                                          | Ref<br>1.11 [0.69;<br>1.82]  | Ref<br>1.09 [0.67;<br>1.78]  | Ref<br>1.09 [0.67;<br>1.78]  | Ref<br>1.08 [0.66;<br>1.77]  |
| Undocumented                                              | 0.60 [0.35;<br>1.02]         | 0.59 [0.35;<br>1.01]         | 0.59 [0.35;<br>1.01]         | 0.59 [0.34;<br>1.00]         |
| Asylum Seeker                                             |                              |                              |                              |                              |
| Length of Stay                                            |                              |                              |                              |                              |
| Sensitivity Analysis 1                                    |                              |                              |                              |                              |
| Length of Stay below 3 months                             | Ref                          |                              |                              |                              |
| Length of Stay above 3 months                             | 0.72 [0.46;<br>1.14]         |                              |                              |                              |
| Sensitivity Analysis 2                                    |                              |                              |                              |                              |
| Length of Stay below 3 months                             |                              | Ref                          |                              |                              |
| Length of Stay between 3months<br>and 10 years            |                              | 0.74 [0.47;<br>1.16]         |                              |                              |
| Length of Stay above 10 years                             |                              | 0.57 [0.25;<br>1.23]         |                              |                              |
| Sensitivity Analysis 3                                    |                              |                              |                              |                              |
| Length of Stay below 3 months                             |                              |                              | Ref                          |                              |
| Length of Stay between 3 months<br>and 5 years            |                              |                              | 0.75 [0.47;<br>1.19]         |                              |
| Length of Stay above 5 years                              |                              |                              | 0.63 [0.35;<br>1.16]         |                              |
| Sensitivity Analysis 4                                    |                              |                              |                              |                              |
| Length of Stay below 3 months                             |                              |                              |                              | 1.47 [0.77;<br>2.86]         |
| Length of Stay above three<br>months and Below five years |                              |                              |                              | 1.10 [0.63;<br>1.95]         |
| Length of Stay above 5 years and<br>less than 10 years    |                              |                              |                              | Ref                          |
| Length of Stay Above 10 years                             |                              |                              |                              | 0.82 [0.36;<br>1.77]         |

| Physical Health |         |         |         |         |
|-----------------|---------|---------|---------|---------|
| Men             |         |         |         |         |
|                 | SA 1    | SA 2    | SA 3    | SA 4    |
| AIC             | 938.23  | 939.68  | 939.83  | 941.57  |
| BIC             | 1031.26 | 1037.36 | 1037.51 | 1043.90 |
| Log Likelihood  | -449.11 | -448.84 | -448.91 | -448.78 |
| Deviance        | 898.23  | 897.68  | 897.83  | 897.57  |
| Num. obs.       | 774     | 774     | 774     | 774     |
