# Supplementary material for: Self-Perceived Health Among Migrants Seen in M&eacute;decins du Monde Free Clinics in Europe: Impact of Length of Stay and Wealth of Country of Origin on Migrants&rsquo; Health
Source: Preprints.org preprint supplement (doi:10.20944/preprints201906.0090.v1), 2019-06-11
Supplement: Supplementary file 8 [file supplementary]

# T5 Full Results for Physical SPH with and without interaction.

| Physical Health      |                               |                               |                              |                              |
|----------------------|-------------------------------|-------------------------------|------------------------------|------------------------------|
|                      | Female                        |                               | Male                         |                              |
|                      | No interaction                | Interaction                   | No interaction               | Interaction                  |
| Age group            |                               |                               |                              |                              |
| 1st quartile [18;28[ | Ref.<br>1.05 [0.59;<br>1.87]  | Ref.<br>1.05 [0.58;<br>1.88]  | Ref.<br>0.91 [0.59;<br>1.40] | Ref.<br>0.91 [0.59;<br>1.40] |
| 2nd quartile [28;34[ | 0.63 [0.35;<br>1.15]          | 0.64 [0.35;<br>1.16]          | 0.62 [0.40;<br>0.97]*        | 0.62 [0.40;<br>0.97]*        |
| 3rd quartile [34;44[ | 0.65 [0.35;<br>1.21]          | 0.65 [0.35;<br>1.21]          | 0.63 [0.37;<br>1.10]         | 0.63 [0.37;<br>1.10]         |
| 4th quartile [44;85] |                               |                               |                              |                              |
| Surveyed Countries   |                               |                               |                              |                              |
| Germany              | Ref.<br>5.56 [0.73;<br>42.37] | Ref.<br>6.10 [0.80;<br>46.32] | Ref.<br>1.15 [0.27;<br>4.82] | Ref.<br>1.15 [0.27;<br>4.84] |
| Switzerland          | 0.55 [0.14;<br>2.12]          | 0.60 [0.15;<br>2.31]          | 2.18 [0.72;<br>6.57]         | 2.19 [0.72;<br>6.67]         |
| Spain                | 0.91 [0.19;<br>4.37]          | 0.97 [0.20;<br>4.70]          | 1.64 [0.42;<br>6.50]         | 1.65 [0.42;<br>6.52]         |
| Turkey               | 0.39 [0.09;<br>1.68]          | 0.40 [0.09;<br>1.75]          | 0.63 [0.16;<br>2.48]         | 0.63 [0.16;<br>2.50]         |
| United Kingdom       |                               |                               |                              |                              |
| Region of Origin     |                               |                               |                              |                              |
| Middle East          | Ref.<br>3.47 [0.87;<br>13.78] | Ref.<br>3.64 [0.92;<br>14.36] | Ref.<br>1.37 [0.57;<br>3.29] | Ref.<br>1.37 [0.57;<br>3.29] |
| Africa               | 7.65 [1.56;<br>37.47]*        | 8.14 [1.67;<br>39.64]*        | 0.74 [0.22;<br>2.43]         | 0.73 [0.22;<br>2.43]         |
| America              | 3.06 [0.68;<br>13.70]         | 3.48 [0.78;<br>15.57]         | 1.99 [0.77;<br>5.12]         | 1.99 [0.77;<br>5.12]         |
| Asia                 | 2.38 [0.45;<br>12.50]         | 2.37 [0.45;<br>12.41]         | 1.55 [0.43;<br>5.61]         | 1.55 [0.43;<br>5.60]         |
| Europe               | 3.94 [0.73;<br>21.18]         | 4.29 [0.80;<br>22.88]         | 1.73 [0.59;<br>5.10]         | 1.73 [0.59;<br>5.10]         |
| Maghreb              |                               |                               |                              |                              |
| Immigration Status   |                               |                               |                              |                              |
| Residence permit     | Ref.<br>0.86 [0.55;<br>1.36]  | Ref.<br>0.88 [0.56;<br>1.39]  | Ref.<br>0.89 [0.61;<br>1.31] | Ref.<br>0.89 [0.61;<br>1.31] |
| Undocumented         | 0.68 [0.42;<br>1.10]          | 0.69 [0.43;<br>1.13]          | 0.56 [0.36;<br>0.86]*        | 0.56 [0.36;<br>0.86]*        |
| Asylum Seeker        |                               |                               |                              |                              |
| Housing conditions   |                               |                               |                              |                              |
| Instable             | Ref.                          | Ref.                          | Ref.                         | Ref.                         |

| Physical Health                               |                       |                        |                       |                       |
|-----------------------------------------------|-----------------------|------------------------|-----------------------|-----------------------|
|                                               | Female                |                        | Male                  |                       |
|                                               | No interaction        | Interaction            | No interaction        | Interaction           |
| Stable                                        | 1.76 [1.15;<br>2.69]* | 1.77 [1.16;<br>2.71]*  | 1.27 [0.90;<br>1.81]  | 1.27 [0.90;<br>1.81]  |
| Income satisfaction                           |                       |                        |                       |                       |
| Not Enough                                    | Ref.                  | Ref.                   | Ref.                  | Ref.                  |
| Enough                                        | 1.36 [0.74;<br>2.53]  | 1.35 [0.73;<br>2.50]   | 0.94 [0.44;<br>1.98]  | 0.94 [0.44;<br>1.98]  |
| Job                                           |                       |                        |                       |                       |
| No                                            | Ref.                  | Ref.                   | Ref.                  | Ref.                  |
| Yes                                           | 1.37 [0.86;<br>2.17]  | 1.39 [0.87;<br>2.21]   | 1.90 [1.30;<br>2.76]* | 1.90 [1.30;<br>2.76]* |
| Insurance coverage                            |                       |                        |                       |                       |
| Yes                                           | Ref.                  | Ref.                   | Ref.                  | Ref.                  |
| No                                            | 1.44 [0.58;<br>3.59]  | 1.42 [0.57;<br>3.53]   | 0.67 [0.29;<br>1.54]  | 0.67 [0.29;<br>1.54]  |
| Length of Stay and Human<br>Development Index |                       |                        |                       |                       |
| Human Development Index<br>above 0.5          | 1.94 [1.06;<br>3.56]* | 5.96 [1.61;<br>22.06]* | 1.41 [0.93;<br>2.13]  | 1.46 [0.61;<br>3.49]  |
| LOS <3 months                                 | 1.96 [1.05;<br>3.65]* | 4.72 [1.48;<br>15.06]* | 0.79 [0.50;<br>1.25]  | 0.81 [0.37;<br>1.76]  |
| Interaction                                   |                       | 0.26 [0.07;<br>1.01]   |                       | 0.96 [0.37;<br>2.47]  |
| AIC                                           | 669.98                | 667.57                 | 937.37                | 939.36                |
| BIC                                           | 761.57                | 763.52                 | 1035.05               | 1041.69               |
| Log Likelihood                                | -313.99               | -311.79                | -447.68               | -447.68               |
| Deviance                                      | 627.98                | 623.57                 | 895.37                | 895.36                |
| Num. obs.                                     | 579                   | 579                    | 774                   | 774                   |

\* 1 outside the confidence interval

Statistical models
